# Supplementary material for: Self-propelled micromotors based on Au–mesoporous silica nanorods
Source: Royal Society of Chemistry journal article supplement (doi:10.1039/c5nr02545a), 2015-01-01
Supplement: c5nr02545a1.pdf [file c5nr02545a1.pdf]

## Self-Propelled Micromotors Based on Au-Mesoporous Silica Nanorods

Ying-Shuai Wang<sup>a</sup>, Hong Xia\*<sup>a</sup>, Chao Lv<sup>a</sup>, Lei Wang<sup>a</sup>, Wen-Fei

Dong<sup>a</sup>, Jing Feng<sup>a</sup>, and Hong-Bo Sun\*<sup>a, b</sup>

<sup>a</sup> State Key Laboratory on Integrated Optoelectronics, College of Electronic Science and Engineering, Jilin University, 2699 Qianjin Street, Changchun 130012, P.R.China. E-mail: [hxia@jlu.edu.cn](mailto:hxia@jlu.edu.cn) (H. Xia) and [hbsun@jlu.edu.cn](mailto:hbsun@jlu.edu.cn) (H.-B.S.).

<sup>b</sup> College of Physics, Jilin University, 119 Jie fang Road, Changchun 130023, P.R.China.

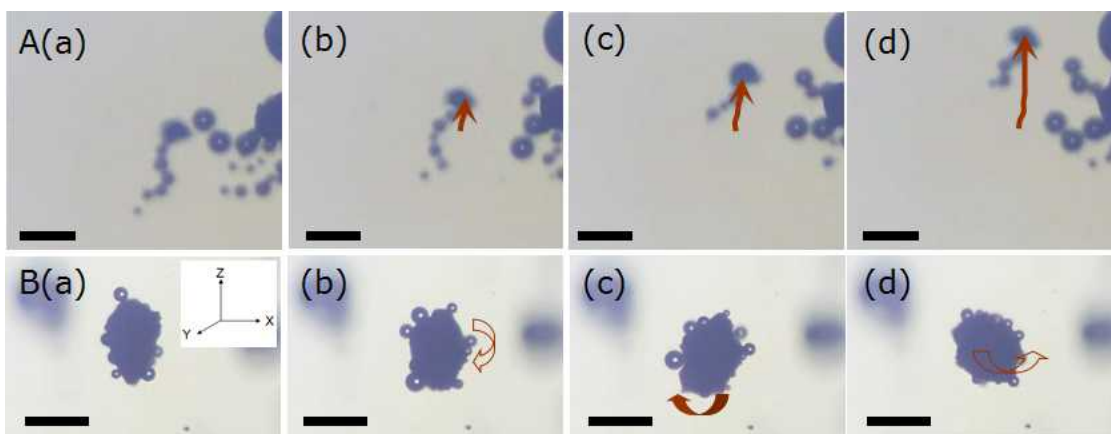

**Fig. S1** Different forms of motion of Bubble-Propelled Au catalytic Micromotors in  $H_2O_2$  solution (20%). The forward motion (A) and (B) Rolling. Solid line for Pxoy movement, hollow for Pyoz movement. Scale bar: 100um

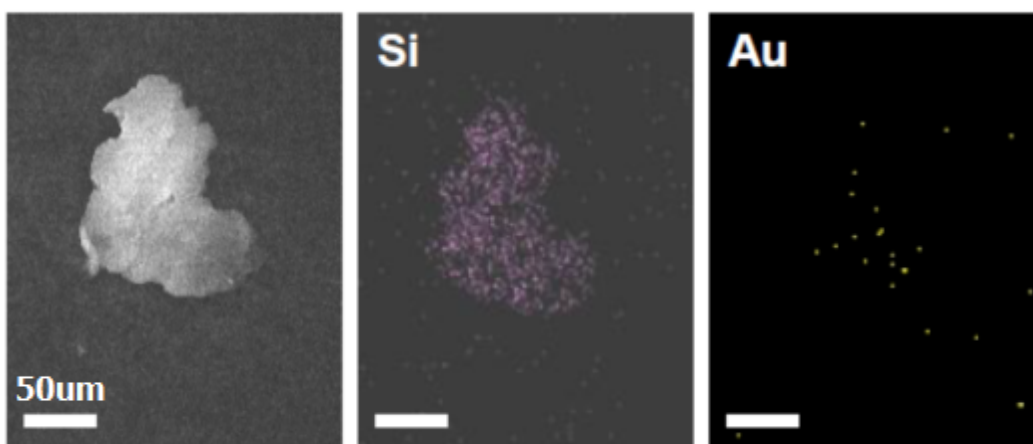

**Fig. S2** The scanning electron microscopy (SEM) image and EDX elemental mapping results of bubble-Propelled Au-SiO<sub>2</sub> micromotors

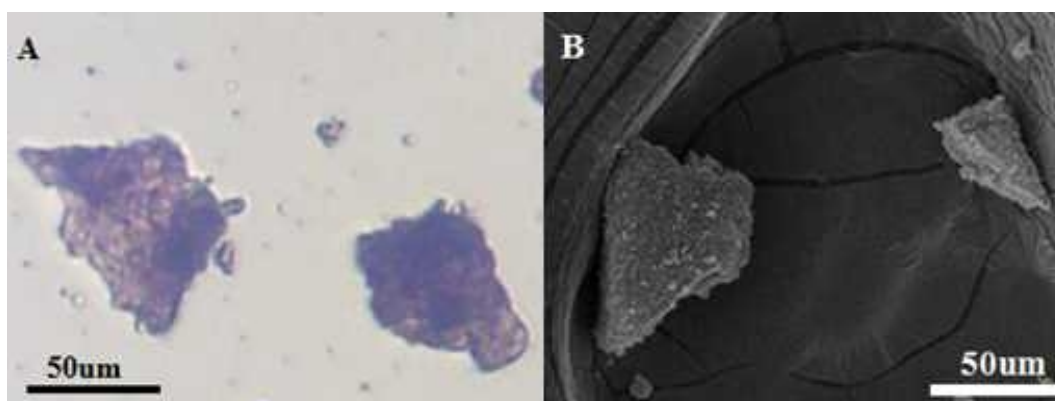

**Fig. S3** The optical microscope (A) and (B) scanning electron microscopy (SEM) image of bubble-Propelled Au-SiO<sub>2</sub> micromotors
